# Supplementary material for: The Analysis of Emotion Authenticity Based on Facial Micromovements
Source: MDPI journal article supplement (doi:10.3390/s21134616), 2021-07-05
Supplement: s1 [file s1]

```

import cv2

import dlib

import numpy as np

import os


# Detect face

def detect_roi_bound(frame, face_cascade, minSize=(150, 150)):

    # Detect face

    faces = face_cascade.detectMultiScale(

        frame,

        scaleFactor=1.1,

        minNeighbors=1,

        # minSize=(100, 100),

        minSize=minSize,

    )

    # Detect roi which have max area/ We are only interested in the 'largest' face

    # So, we determine this based on the largest area of the found rectangle.

    # First initialize the required variables to 0

    max_area = 0

    roi = (0, 0, 0, 0)

    is_detect = False

    # Loop over all faces and check if the area for this face is the largest so far

    for i in range(len(faces)):

        area = faces[i][0] * faces[i][1]

        if area > max_area:

            max_area = area

            roi = faces[i]

            is_detect = True

    #return (630, 320, 300, 300), True

    #print("Optimal", roi)

    return roi, is_detect


# Detect face

def detect_roi_bounds(frame, face_cascade):

```

```

# Detect face

faces = face_cascade.detectMultiScale(

    frame,

    scaleFactor=1.1,

    minNeighbors=1,

    minSize=(150, 150),

)

# Detect roi from first face

rois = []

is_detect = False

for (x, y, w, h) in faces:

    roi = (x, y, w, h)

    rois.append(roi)

    is_detect = True


#return [(630, 320, 300, 300)], True

#print("First ", rois, is_detect)

return rois, is_detect


def define_facial_landmark_points(predictor, frame, roi):    # predictor: dlib model

    shape = predictor(frame, roi)

    return shape


def shape_to_np(shape, dtype="int"):

    # initialize the list of (x, y)-coordinates to zero

    coords = np.zeros((68, 2), dtype=dtype)

    # loop over the 68 facial landmarks and convert them

    # to a 2-tuple of (x, y)-coordinates

    for i in range(0, 68):

        coords[i] = (shape.part(i).x, shape.part(i).y)

    # return the list of (x, y)-coordinates

    return coords

```

```
# au centroid calculation
```

```
def calculate_au_centroid(coords, dtype="int"):
```

```
    # define au points
```

```
    # x = round((x1 + x2 + x3) / 3, 2)
```

```
    # y = round((y1 + y2 + y3) / 3, 2)
```

```
    au_list = np.zeros((13, 2), dtype=dtype)
```

```
    M_au4_x = round((coords[21][0] + coords[22][0] + coords[27][0]) / 3, 2)
```

```
    M_au4_y = round((coords[21][1] + coords[22][1] + coords[27][1]) / 3, 2)
```

```
    R_au5_x = round((coords[18][0] + coords[20][0] + coords[37][0]) / 3, 2)
```

```
    R_au5_y = round((coords[18][1] + coords[20][1] + coords[37][1]) / 3, 2)
```

```
    R_au6_x = round((coords[1][0] + coords[17][0] + coords[36][0]) / 3, 2)
```

```
    R_au6_y = round((coords[1][1] + coords[17][1] + coords[36][1]) / 3, 2)
```

```
    R_au12_x = round((coords[2][0] + coords[31][0] + coords[48][0]) / 3, 2)
```

```
    R_au12_y = round((coords[2][1] + coords[31][1] + coords[48][1]) / 3, 2)
```

```
    R_au15_x = round((coords[5][0] + coords[6][0] + coords[48][0]) / 3, 2)
```

```
    R_au15_y = round((coords[5][1] + coords[6][1] + coords[48][1]) / 3, 2)
```

```
    R_au23_x = round((coords[49][0] + coords[50][0] + coords[61][0]) / 3, 2)
```

```
    R_au23_y = round((coords[49][1] + coords[50][1] + coords[61][1]) / 3, 2)
```

```
    L_au5_x = round((coords[23][0] + coords[25][0] + coords[44][0]) / 3, 2)
```

```
    L_au5_y = round((coords[23][1] + coords[25][1] + coords[44][1]) / 3, 2)
```

```
    L_au6_x = round((coords[15][0] + coords[26][0] + coords[45][0]) / 3, 2)
```

```
    L_au6_y = round((coords[15][1] + coords[26][1] + coords[45][1]) / 3, 2)
```

```
    L_au12_x = round((coords[14][0] + coords[35][0] + coords[54][0]) / 3, 2)
```

```
    L_au12_y = round((coords[14][1] + coords[35][1] + coords[54][1]) / 3, 2)
```

```
    L_au15_x = round((coords[10][0] + coords[11][0] + coords[54][0]) / 3, 2)
```

```
    L_au15_y = round((coords[10][1] + coords[11][1] + coords[54][1]) / 3, 2)
```

```
    L_au23_x = round((coords[52][0] + coords[53][0] + coords[63][0]) / 3, 2)
```

```
    L_au23_y = round((coords[52][1] + coords[53][1] + coords[63][1]) / 3, 2)
```

```
    au_list[0] = (M_au4_x, M_au4_y)
```

```
    au_list[1] = (L_au5_x, L_au5_y)
```

```

au_list[2] = (L_au6_x, L_au6_y)
au_list[3] = (L_au12_x, L_au12_y)
au_list[4] = (L_au15_x, L_au15_y)
au_list[5] = (L_au23_x, L_au23_y)
au_list[6] = (R_au5_x, R_au5_y)
au_list[7] = (R_au6_x, R_au6_y)
au_list[8] = (R_au12_x, R_au12_y)
au_list[9] = (R_au15_x, R_au15_y)
au_list[10] = (R_au23_x, R_au23_y)

```

```

return au_list

```

```

def track_roi_straight_forward(roi, prev_roi):
    x, y, w, h = roi
    prev_x, prev_y, prev_w, prev_h = prev_roi
    if (x < prev_x + prev_w) & \
        (x + w > prev_x) & \
        (y < prev_y + prev_h) & \
        (y + h > prev_y):
        return True
    return False

```

```

def extract_raw_signal_from_facial_landmark_points(prev_shape, curr_shape):
    raw_signal_x = []
    raw_signal_y = []

    for prev_s, curr_s in zip(prev_shape, curr_shape):
        x = prev_s[0] - curr_s[0]
        y = prev_s[1] - curr_s[1]
        raw_signal_x.append(x)
        raw_signal_y.append(y)
    #print("landmark", raw_signal_x)
    return raw_signal_x, raw_signal_y

```

```
def extract_raw_signal_from_facial_au_points(prev_au_shape, curr_au_shape):
```

```
    au_signal_x = []
```

```
    au_signal_y = []
```

```
    for prev_au, curr_au in zip(prev_au_shape, curr_au_shape):
```

```
        au_x = prev_au[0] - curr_au[0]
```

```
        au_y = prev_au[1] - curr_au[1]
```

```
        au_signal_x.append(au_x)
```

```
        au_signal_y.append(au_y)
```

```
    #print("au", au_signal_x)
```

```
    return au_signal_x, au_signal_y
```

```
def calculate_size_diff(roi, prev_roi):
```

```
    _, w, h = roi
```

```
    _, prev_w, prev_h = prev_roi
```

```
    roi_size = w * h
```

```
    prev_roi_size = prev_w * prev_h
```

```
    size_diff = abs(roi_size - prev_roi_size)
```

```
    return size_diff
```

```
def extract_signal_straight_forward(frames, haar_path='./haarcascade_frontalface_alt2.xml',  
dlib_path='./shape_predictor_68_face_landmarks.dat', is_display=False):
```

```
    # Load face cascade
```

```
    face_cascade = cv2.CascadeClassifier()
```

```
    is_load = face_cascade.load(haar_path)
```

```
    print('Load cascade ', is_load)
```

```
    # Load shape predictor
```

```
    predictor = dlib.shape_predictor(dlib_path)
```

```
    # Initialize variables
```

```
    is_init = False
```

```
    is_au_init = False
```

```
    is_detect = False
```

```

roi = None

prev_roi = None

prev_shape = None

prev_au_shape = None

signals_x = [[] for _ in range(68)]

signals_y = [[] for _ in range(68)]

au_signals_x = [[] for _ in range(13)]

au_signals_y = [[] for _ in range(13)]


# Loop
for frame in frames:

    try:

        # Convert to gray scale
        gray_frame = cv2.cvtColor(frame, cv2.COLOR_BGR2GRAY)

        # 1. ROI detection - Viola-Jones
        if is_detect is False:

            roi, is_detect = detect_roi_bound(gray_frame, face_cascade=face_cascade, minSize=(150, 150))

            if is_detect is False:

                print('Detection is failed')

                for i in range(68):

                    signals_x[i].append(0)

                    signals_y[i].append(0)

                continue

        # 3. ROI tracking - Straight forward
        else:

            is_track = False

            rois, _ = detect_roi_bounds(gray_frame, face_cascade=face_cascade)

            min_size_diff = None

            for i in range(len(rois)):

                is_track = track_roi_straight_forward(rois[i], prev_roi)

                if is_track:

                    size_diff = calculate_size_diff(rois[i], prev_roi)

                    if min_size_diff is None:

```

```

        roi = rois[i]

        min_size_diff = size_diff

    elif min_size_diff > size_diff:

        roi = rois[i]

        min_size_diff = size_diff

    if is_track is False:

        roi = prev_roi

# 2. ROI definition - Facial landmark point

roi_dlib = dlib.rectangle(int(roi[0]), int(roi[1]), int(roi[0] + roi[2]), int(roi[1] + roi[3]))

shape = define_facial_landmark_points(predictor, gray_frame, roi_dlib)

shape = shape_to_np(shape)

shape_au = calculate_au_centroid(shape)

#print(shape)

#print(shape_au)

# 4. Raw signal extraction - Head motion based method

if is_init:

    signal_x, signal_y = extract_raw_signal_from_facial_landmark_points(prev_shape, shape)

    for i in range(68):

        signals_x[i].append(signal_x[i])

        signals_y[i].append(signal_y[i])

else:

    is_init = True

#5. Raw signal extraction - au piont - Head motion based method

if is_au_init:

    au_signal_x, au_signal_y = extract_raw_signal_from_facial_au_points(prev_au_shape, shape_au)

    for i in range(13):

        au_signals_x[i].append(au_signal_x[i])

        au_signals_y[i].append(au_signal_y[i])

```

else:

is\_au\_init = True

# Display

if is\_display is True:

cv2.imshow('raw\_frame', frame)

cv2.rectangle(frame, (roi[0], roi[1]), (roi[0] + roi[2], roi[1] + roi[3]), (0, 255, 0), 3, 4, 0)

for (x, y) in shape:

cv2.circle(frame, (x, y), 1, (0, 0, 255), -1)

for (au\_x, au\_y) in shape\_au:

cv2.circle(frame, (au\_x, au\_y), 1, (255, 0, 0), -1)

cv2.imshow('frame', frame)

k = cv2.waitKey(30) & 0xff

if k == 30:

break

# Save previous roi

prev\_roi = roi

prev\_shape = shape

prev\_au\_shape = shape\_au

except:

break

return signals\_x, signals\_y, au\_signals\_x, au\_signals\_y

def test\_cam\_straight\_forward(result\_filename,  
dlib\_path='./shape\_predictor\_68\_face\_landmarks.dat'):

haar\_path='./haarcascade\_frontalface\_alt2.xml',

import cv2

# Open file

f = open('./' + result\_filename + '.txt', 'w')

```

# Open video

cap = cv2.VideoCapture(0)


# Load face cascade

face_cascade = cv2.CascadeClassifier()

is_load = face_cascade.load(haar_path)

print('Load cascade ', is_load)


# Load shape predictor

predictor = dlib.shape_predictor(dlib_path)


# Initialize variables

is_init = False

is_detect = False

roi = None

prev_roi = None

prev_shape = None

signals_x = [[] for _ in range(68)]

signals_y = [[] for _ in range(68)]


# Read frames

while True:

    try:

        ret, frame = cap.read() # Capture frame

        if ret:

            try:

                # Convert to gray scale

                gray_frame = cv2.cvtColor(frame, cv2.COLOR_BGR2GRAY)

                # 1. ROI detection - Viola-Jones

                if is_detect is False:

                    roi, is_detect = detect_roi_bound(gray_frame, face_cascade=face_cascade)

                    if is_detect is False:

                        print('Detection is failed')

```

```
f.write(str(0) + '\n')
```

```
continue
```

```
# 3. ROI tracking - Straight forward
```

```
else:
```

```
is_track = False
```

```
rois, _ = detect_roi_bounds(gray_frame, face_cascade=face_cascade)
```

```
for i in range(len(rois)):
```

```
    is_track = track_roi_straight_forward(rois[i], prev_roi)
```

```
    if is_track:
```

```
        roi = rois[i]
```

```
        break
```

```
    if is_track is False:
```

```
        roi = prev_roi
```

```
# 2. ROI definition - Facial landmark point
```

```
roi_dlib = dlib.rectangle(int(roi[0]), int(roi[1]), int(roi[0] + roi[2]), int(roi[1] + roi[3]))
```

```
shape = define_facial_landmark_points(predictor, gray_frame, roi_dlib)
```

```
shape = shape_to_np(shape)
```

```
print('shape=', shape)
```

```
# 4. Raw signal extraction - Head motion based method
```

```
if is_init:
```

```
    signal_x, signal_y = extract_raw_signal_from_facial_landmark_points(prev_shape, shape)
```

```
    for i in range(68):
```

```
        signals_x[i].append(signal_x[i])
```

```
        signals_y[i].append(signal_y[i])
```

```
    print('signal=', signal_x, signal_y)
```

```
    # Write signal to file
```

```
    for i in range(68):
```

```
        f.write(str(signal_x[i]) + '\t')
```

```
    for i in range(68):
```

```
        f.write(str(signal_y[i]) + '\t')
```

```
    f.write('\n')
```

```
else:
```

```
is_init = True
```

```
# Display
```

```
cv2.rectangle(frame, (roi[0], roi[1]), (roi[0] + roi[2], roi[1] + roi[3]), (0, 255, 0), 3, 4, 0)
```

```
for (x, y) in shape:
```

```
    cv2.circle(frame, (x, y), 1, (0, 0, 255), -1)
```

```
cv2.imshow('frame', frame)
```

```
k = cv2.waitKey(30) & 0xff
```

```
if k == 30:
```

```
    break
```

```
# Save previous roi
```

```
prev_roi = roi
```

```
prev_shape = shape
```

```
except:
```

```
    break
```

```
else:
```

```
    break
```

```
except Exception as e:
```

```
    print(e)
```

```
    break
```

```
# Close file
```

```
cap.release()
```

```
f.close()
```

```
def test_video_straight_forward(filename, landmark_filename, au_filename,  
haar_path='./haarcascade_frontalface_alt2.xml', dlib_path='./shape_predictor_68_face_landmarks.dat'):
```

```
    import cv2
```

```
# Open file
```

```

f1 = open('./' + landmark_filename + '.txt', 'w')

f2 = open('./' + au_filename + '.txt', 'w')


# Open video

cap = cv2.VideoCapture(filename)


# Read frames

frames = []

while True:

    try:

        ret, frame = cap.read() # Capture frame

        if ret:

            frames.append(frame)

        else:

            break

    except:

        break


# Close video

cap.release()


# Extract signal

signal_x, signal_y, au_signal_x, au_signal_y = extract_signal_straight_forward(frames, haar_path=haar_path,
dlib_path=dlib_path, is_display=True)


# Write signal to file_landmark

for i in range(len(signal_x[0])):

    for j in range(len(signal_x)):

        f1.write(str(signal_x[j][i]) + "\t")

    for j in range(len(signal_y)):

        f1.write(str(signal_y[j][i]) + "\t")

    f1.write('\n')

```

```

# Write signal to file_au

for i in range(len(au_signal_x[0])):
    for j in range(len(au_signal_x)):
        f2.write(str(au_signal_x[j][i]) + "\t")
    for j in range(len(au_signal_y)):
        f2.write(str(au_signal_y[j][i]) + "\t")
    f2.write('\n')

# for s in signal:
#     f.write(str(s) + '\n')

# Close file
f1.close()
f2.close()

def load_data():
    import os
    dir = 'D:/1. Project/RFSmile/Real/Real_2'
    #dir = 'D:/1. Project/RFSmile/Fake/Fake_2'

    for root, dirs, files in os.walk(dir):
        for file in files:
            user_name = file[:-8]
            filename = dir + '/' + file
            # analysis(filename)
            test_video_straight_forward(filename,
                                         landmark_filename= user_name + '_landmark',
                                         au_filename= user_name + '_au')

if __name__ == '__main__':
    #test_cam_straight_forward(result_filename='v_sw')
    path_dir = 'D:/1. Project/RFSmile/Real/Real_2'
    user_name = '/Ohsojung_Real_1_cut'

    test_video_straight_forward(filename=path_dir + user_name + '.mp4',

```

```
landmark_filename= user_name + '_landmark',
```

```
au_filename= user_name + '_au')
```

```
#load_data()
```
